# Supplementary figures and images for: Giant Aneurysm in the V1 Segment of Vertebral Artery: A Case Report and Literature Review
Source: PubMed Central journal article supplement — NMC Case Rep J. 2024 Nov 16;11:327–32. doi: 10.2176/jns-nmc.2024-0149 (PMC11618053; doi:10.2176/jns-nmc.2024-0149), 2024-11-16

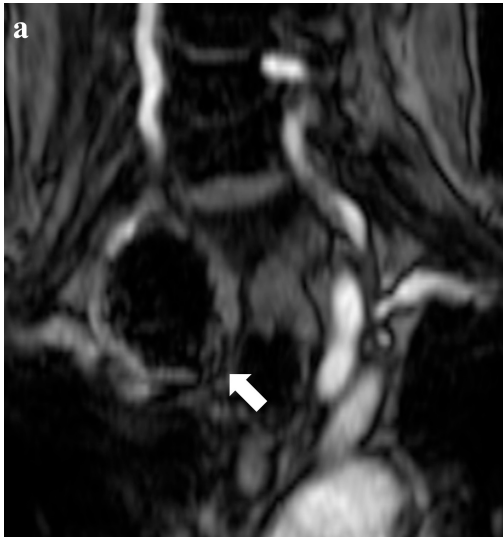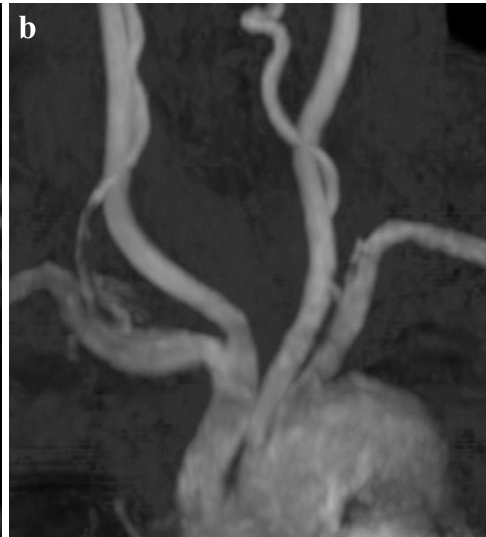

Supplement: 2188-4226-11-0327-s001.pdf [file 2188-4226-11-0327-s001.pdf]
